# Supplementary material for: Fabrication, thermal analysis, and heavy ion irradiation resistance of epoxy matrix nanocomposites loaded with silane-functionalized ceria nanoparticles
Source: Royal Society of Chemistry journal article supplement (doi:10.1039/d1cp05033h), 2022-01-01
Supplement: d1cp05033h1.pdf [file d1cp05033h1.pdf]

## *Supporting Information*

### **FABRICATION, THERMAL ANALYSIS, AND HEAVY ION IRRADIATION RESISTANCE OF EPOXY MATRIX NANOCOMPOSITES LOADED WITH SILANE-FUNCTIONALIZED CERIA NANOPARTICLES**

Clare Davis-Wheeler Chin<sup>†</sup>, Marissa A. Ringgold<sup>†</sup>, Erica M. Redline<sup>§</sup>, Avi G. Bregman<sup>†</sup>,  
Amanda S. Peretti<sup>§</sup>, Khalid Hattar<sup>§</sup>, and LaRico J. Treadwell<sup>†\*</sup>

<sup>†</sup>Advanced Materials Laboratory, Sandia National Laboratories  
1001 University Blvd. SE, Suite 100, Albuquerque, NM USA

<sup>§</sup>Sandia National Laboratories, P.O. Box 5800, Albuquerque, NM 87185-1411, USA

*Please address all correspondence to Dr. LaRico J. Treadwell*  
Email: ljtread@sandia.gov; Tel.: (505) 389-3503; Fax: (505) 284-3017

#### **TABLE OF CONTENTS**

|                  |                                                                             |     |
|------------------|-----------------------------------------------------------------------------|-----|
| <b>Table S1</b>  | SRIM simulation inputs for neat epoxy and composites                        | S2  |
| <b>Figure S1</b> | FTIR spectra for pristine ceria and SCA-NPs                                 | S3  |
| <b>Table S2</b>  | Vibrational data for pristine ceria and SCA-NPs                             | S3  |
| <b>Figure S2</b> | TGA weight loss and derivative weight change curves for SCA-NPs             | S4  |
| <b>Table S3</b>  | TGA percent weight loss of SCA-NPs                                          | S4  |
| <b>Figure S3</b> | Derivative weight change curves of composites                               | S5  |
| <b>Table S4</b>  | Decomposition rate of composites at DWC maximum temperature                 | S5  |
| <b>Figure S4</b> | DSC curves showing $T_g$ variation with nanofiller loading                  | S6  |
| <b>Table S5</b>  | Glass transition temperature values                                         | S6  |
| <b>Figure S5</b> | Surface SEM for MTES composites before and after irradiation                | S7  |
| <b>Figure S6</b> | Cross-sectional SEM images for MTES composites before and after irradiation | S8  |
| <b>Scheme S1</b> | Initiation of radical degradation in epoxy aliphatic segment                | S9  |
| <b>Scheme S2</b> | Initiation of radical degradation in bisphenol A (BPA) moiety               | S10 |
| <b>Scheme S3</b> | Degradation of BPA moiety via Radical K reactions                           | S10 |

|                                  | <u>H</u> | <u>C</u> | <u>O</u> | <u>Ce</u> |
|----------------------------------|----------|----------|----------|-----------|
| <b><u>Energy values (eV)</u></b> |          |          |          |           |
| Displacement                     | 2.0      | 7.4      | 2.0      | 4.2       |
| Surface binding                  | 10       | 28       | 28       | 56        |
| Lattice binding                  | 0        | 0        | 0        | 0         |
| <b><u>Atom stoichiometry</u></b> |          |          |          |           |
| Neat epoxy                       | 19       | 18       | 3        | 0         |
| Ce20                             | 15.2     | 14.4     | 2.8      | 0.2       |
| Ce60                             | 7.6      | 7.2      | 2.4      | 0.6       |

**Table S1.** Summary of input and calculation parameters for SRIM simulations

Binding energy values were supplied by the SRIM program. Displacement energy represents the energy needed for a recoil to overcome lattice forces and move at least one atom spacing away from its original site, whereas lattice binding energy is the energy lost by every target atom leaving its original lattice site and recoiling within the target.

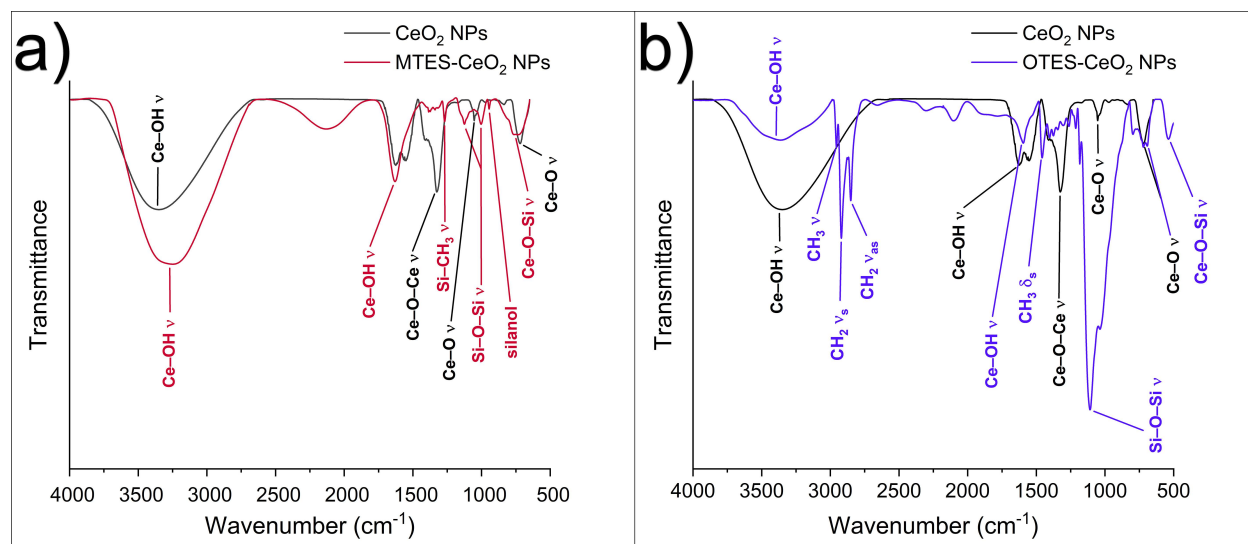

**Figure S1.** FTIR spectra of pristine ceria NPs compared to SCA-NPs functionalized with (a) MTES and (b) OTES.

| $\tilde{\nu}$ (cm <sup>-1</sup> ) | Vibration                       | Ceria NPs (%T) | MTES-NPs (%T) | OTES-NPs (%T) |
|-----------------------------------|---------------------------------|----------------|---------------|---------------|
| 3400                              | Ce-OH v                         | 0              | 0             | 87            |
| 2960                              | CH <sub>3</sub> v               | –              | –             | 84            |
| 2920                              | CH <sub>2</sub> v <sub>s</sub>  | –              | –             | 55            |
| 2870                              | CH <sub>2</sub> v <sub>as</sub> | –              | –             | 80            |
| 1630                              | Ce-OH v                         | 70             | 50            | 86            |
| 1460                              | CH <sub>3</sub> δ <sub>s</sub>  | –              | –             | 89            |
| 1320                              | Ce-O-Ce v                       | 85             | –             | –             |
| 1270                              | Si-CH <sub>3</sub> v            | –              | 86            | 79            |
| 1120                              | Si-O-Si v <sub>s</sub>          | –              | 84            | 0             |
| 1030                              | Si-O-Si v <sub>as</sub>         | –              | 84            | 26            |
| 950                               | Residual silanol v              | –              | 93            | –             |
| 780                               | Ce-O-Si v                       | –              | 78            | 88            |
| 720                               | Ce-O v                          | 60             | 78            | 84            |
| 530                               | Ce-O-Si v                       | –              | 86            | 87            |

**Table S2.** Transmittance of pristine and SCA-functionalized ceria NPs.

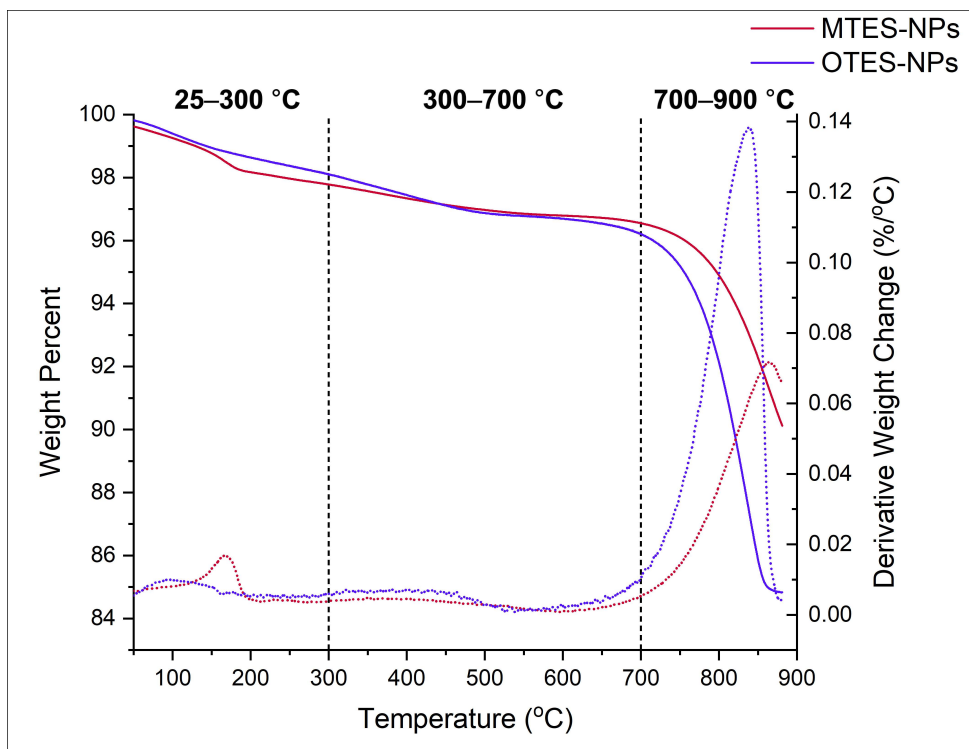

**Figure S2.** Weight loss and derivative weight change curves for MTES and OTES-NPs given by TGA. No significant difference is observed between the two samples in the lower temperature regimes. The substantial increase in weight loss and derivative weight change in the OTES-NPs above 700 °C is associated with the total decomposition of SCAs, and suggests greater surface loading by OTES-NPs.

| <u>Temperature (°C)</u> | <u>Weight Loss Event</u>           | <u>MTES-NPs</u> | <u>OTES-NPs</u> |
|-------------------------|------------------------------------|-----------------|-----------------|
| <b>25 – 300</b>         | Loss of physisorbed surface water  | 2.2             | 1.8             |
| <b>300 – 700</b>        | Degradation of silane alkyl chains | 1.0             | 1.4             |
| <b>700 – 900</b>        | Decomposition of grafted silanes   | 6.6             | 12.0            |

**Table S3.** TGA percent weight loss of SCA-functionalized ceria NPs.

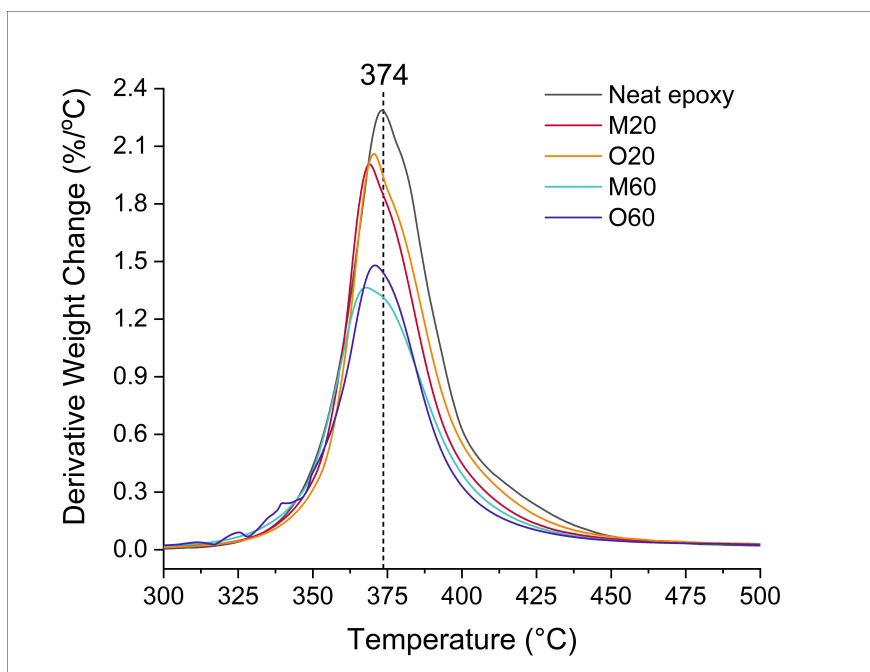

**Figure S3.** TGA derivative weight loss curves for low and high loading composite samples.

| Sample     | 0 wt% | 20 wt% | 30 wt% | 40 wt% | 50 wt% |
|------------|-------|--------|--------|--------|--------|
| Neat epoxy | 2.25  | -      | -      | -      | -      |
| MTES-EPON  | -     | 2.00   | 1.97   | 1.67   | 1.27   |
| OTES-EPON  | -     | 2.05   | 1.91   | 1.76   | 1.47   |

**Table S4.** Decomposition rate (%/°C) at derivative weight change  $T_{\max}$  of 374 °C.

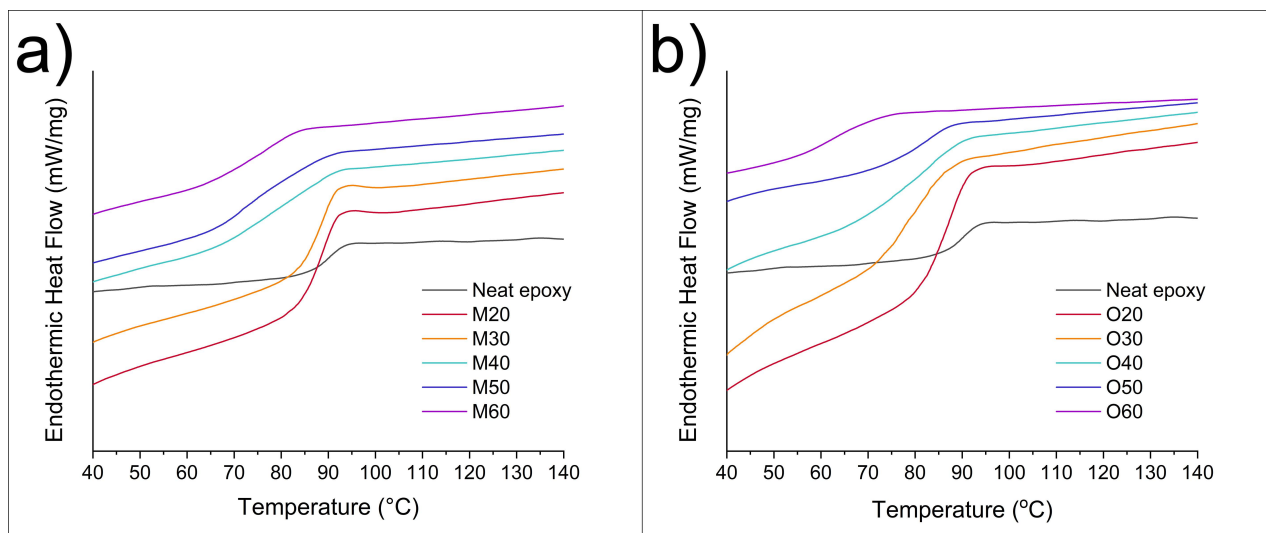

**Figure S4.** DSC curves used for  $T_g$  calculations for all loading values of (a) MTES and (b) OTES composites. DSC thermograms showed a decrease in  $T_g$  with increased nanofiller loading for both types of composite.

| <u>NP Loading (wt%)</u> | <u>MTES-EPON <math>T_g</math> (°C)</u> | <u>OTES-EPON <math>T_g</math> (°C)</u> |
|-------------------------|----------------------------------------|----------------------------------------|
| 0                       | 90.0                                   | 90.0                                   |
| 20                      | 89.0                                   | 87.6                                   |
| 30                      | 88.1                                   | 86.1                                   |
| 40                      | 79.5                                   | 85.3                                   |
| 50                      | 77.8                                   | 83.7                                   |
| 60                      | 76.9                                   | 83.3                                   |

**Table S5.** Glass transition temperature ( $T_g$ ) of nanocomposites with different loading levels of SCA-NPs. Values for  $T_g$  were determined from the second heating cycle of DSC traces that were collected before samples were irradiated.

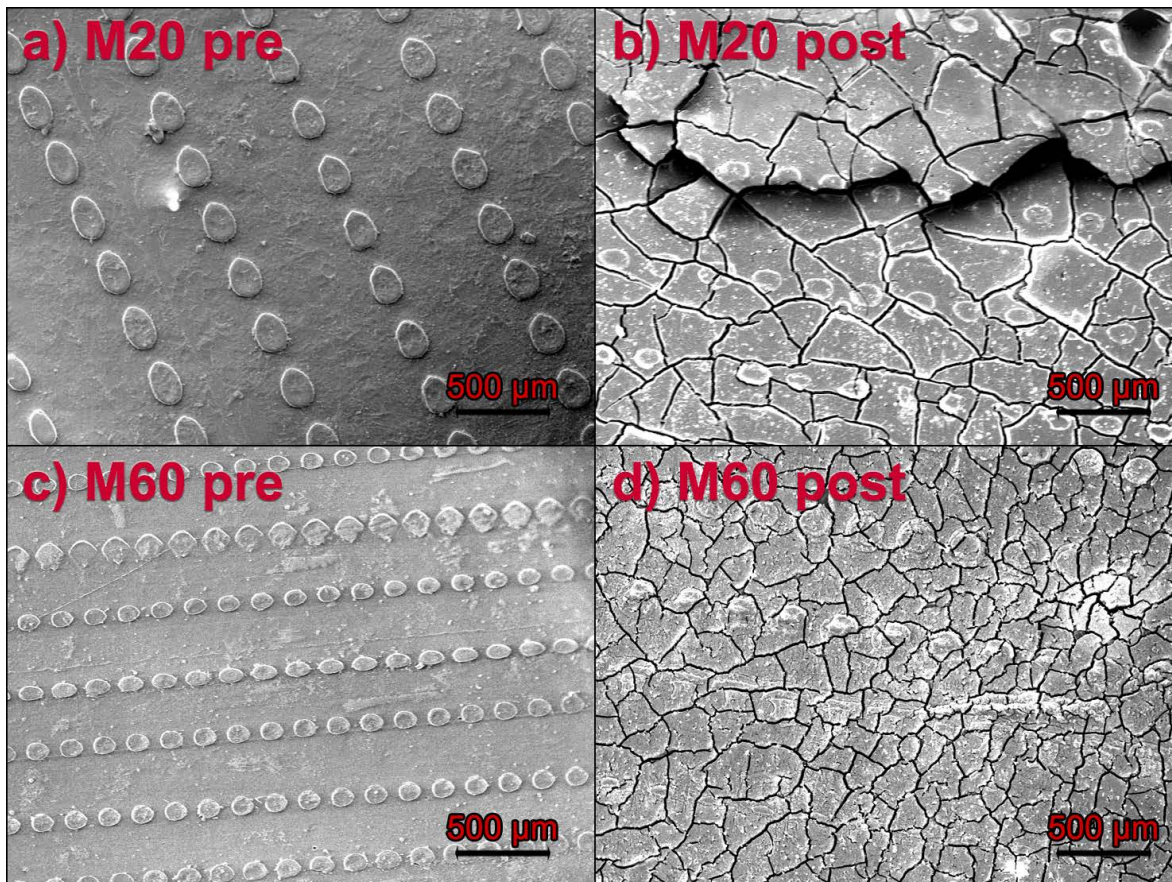

**Figure S5.** Surface SEM micrographs recorded for M20 and M60 samples recorded before and after heavy ion irradiation.



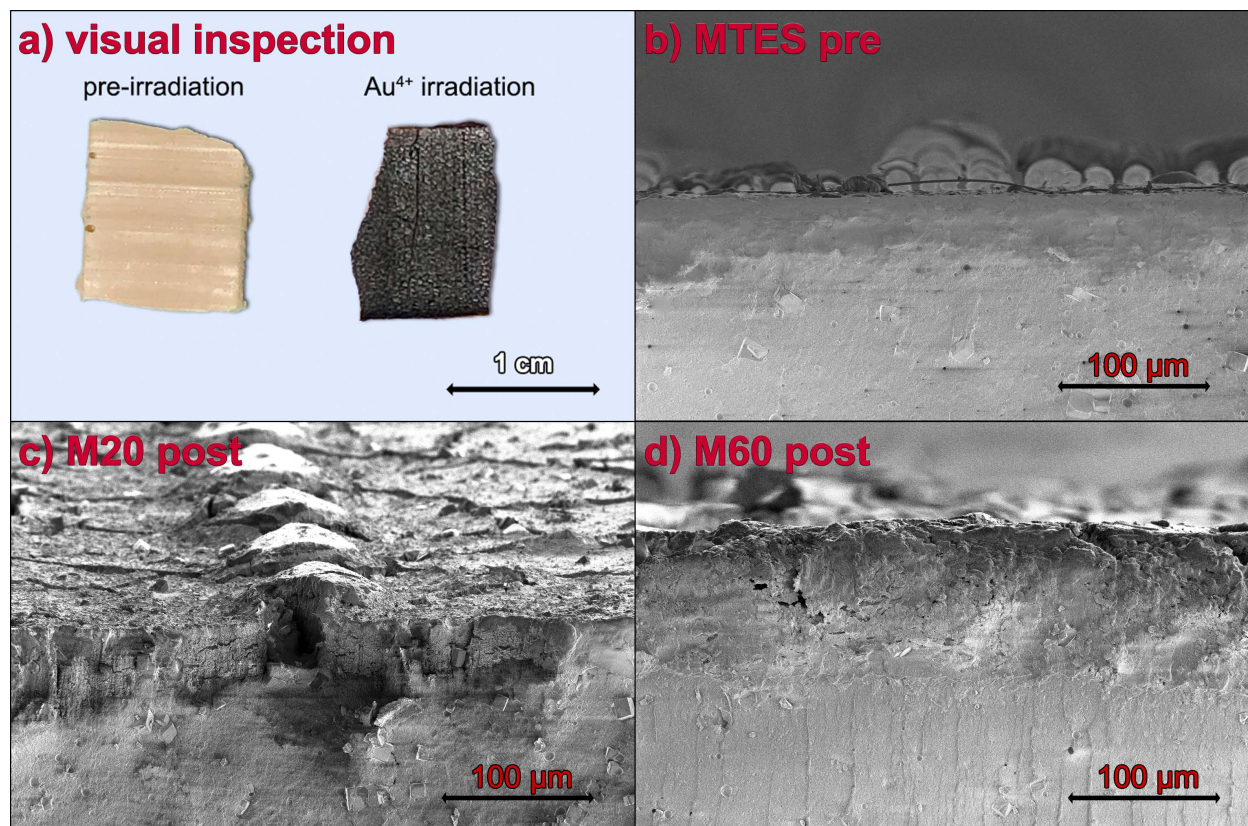

**Figure S6.** (a) Visual inspection of M60 samples before and after heavy ion irradiation. XSEM images comparing MTES samples before irradiation (b) to irradiated (c) M20 and (d) M60 samples.



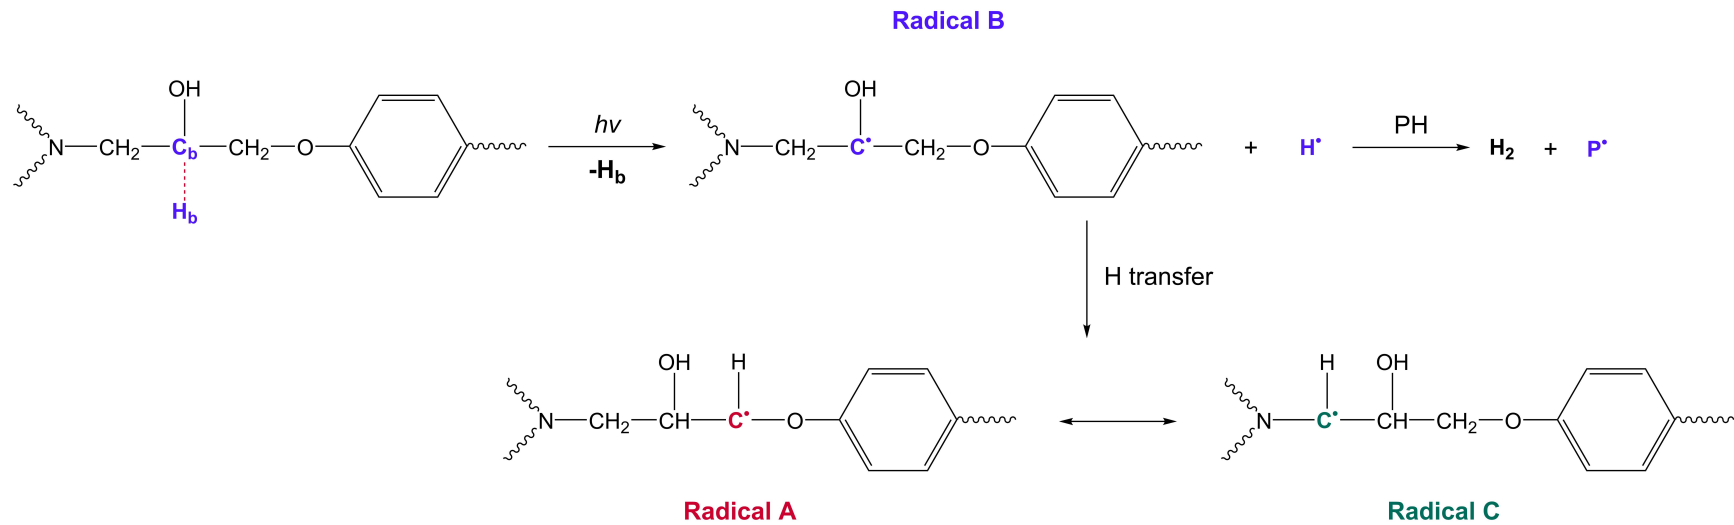

**Scheme S1.** Radiolytic initiation of radical degradation pathways in the epoxy aliphatic segment.

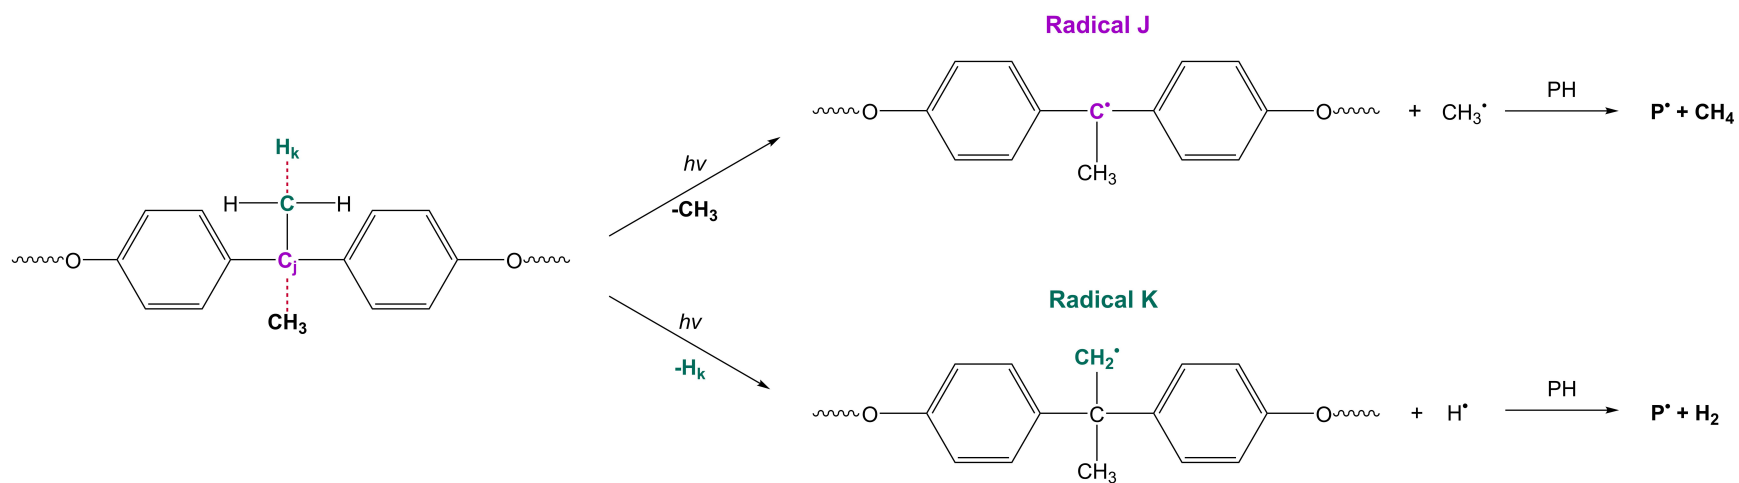

**Scheme S2.** Radiolytic degradation in bisphenol A moiety initiated by methyl group scission to form Radicals J and K.

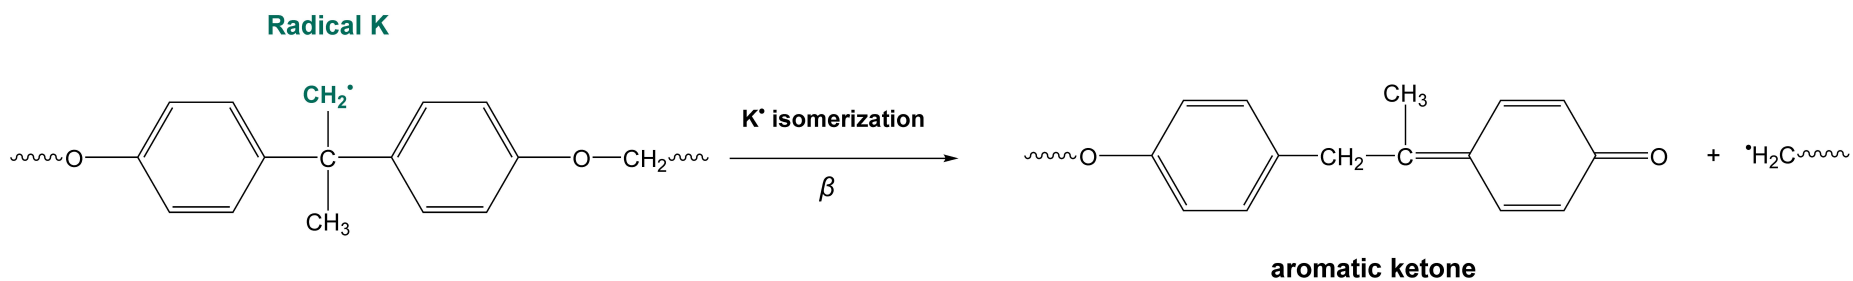

**Scheme S3.** Alternative pathway for bisphenol A moiety degradation initiated by radiolytic hydrogen abstraction from a BPA methyl group to form Radical K, which undergoes isomerization via beta scission to form an aromatic ketone.
